# Supplementary material
Source: Springer Nature journal article supplement (https://www.springermedizin.de/resource/supplementary/13032_2009_28_MOESM2_ESM.pdf/9651450)

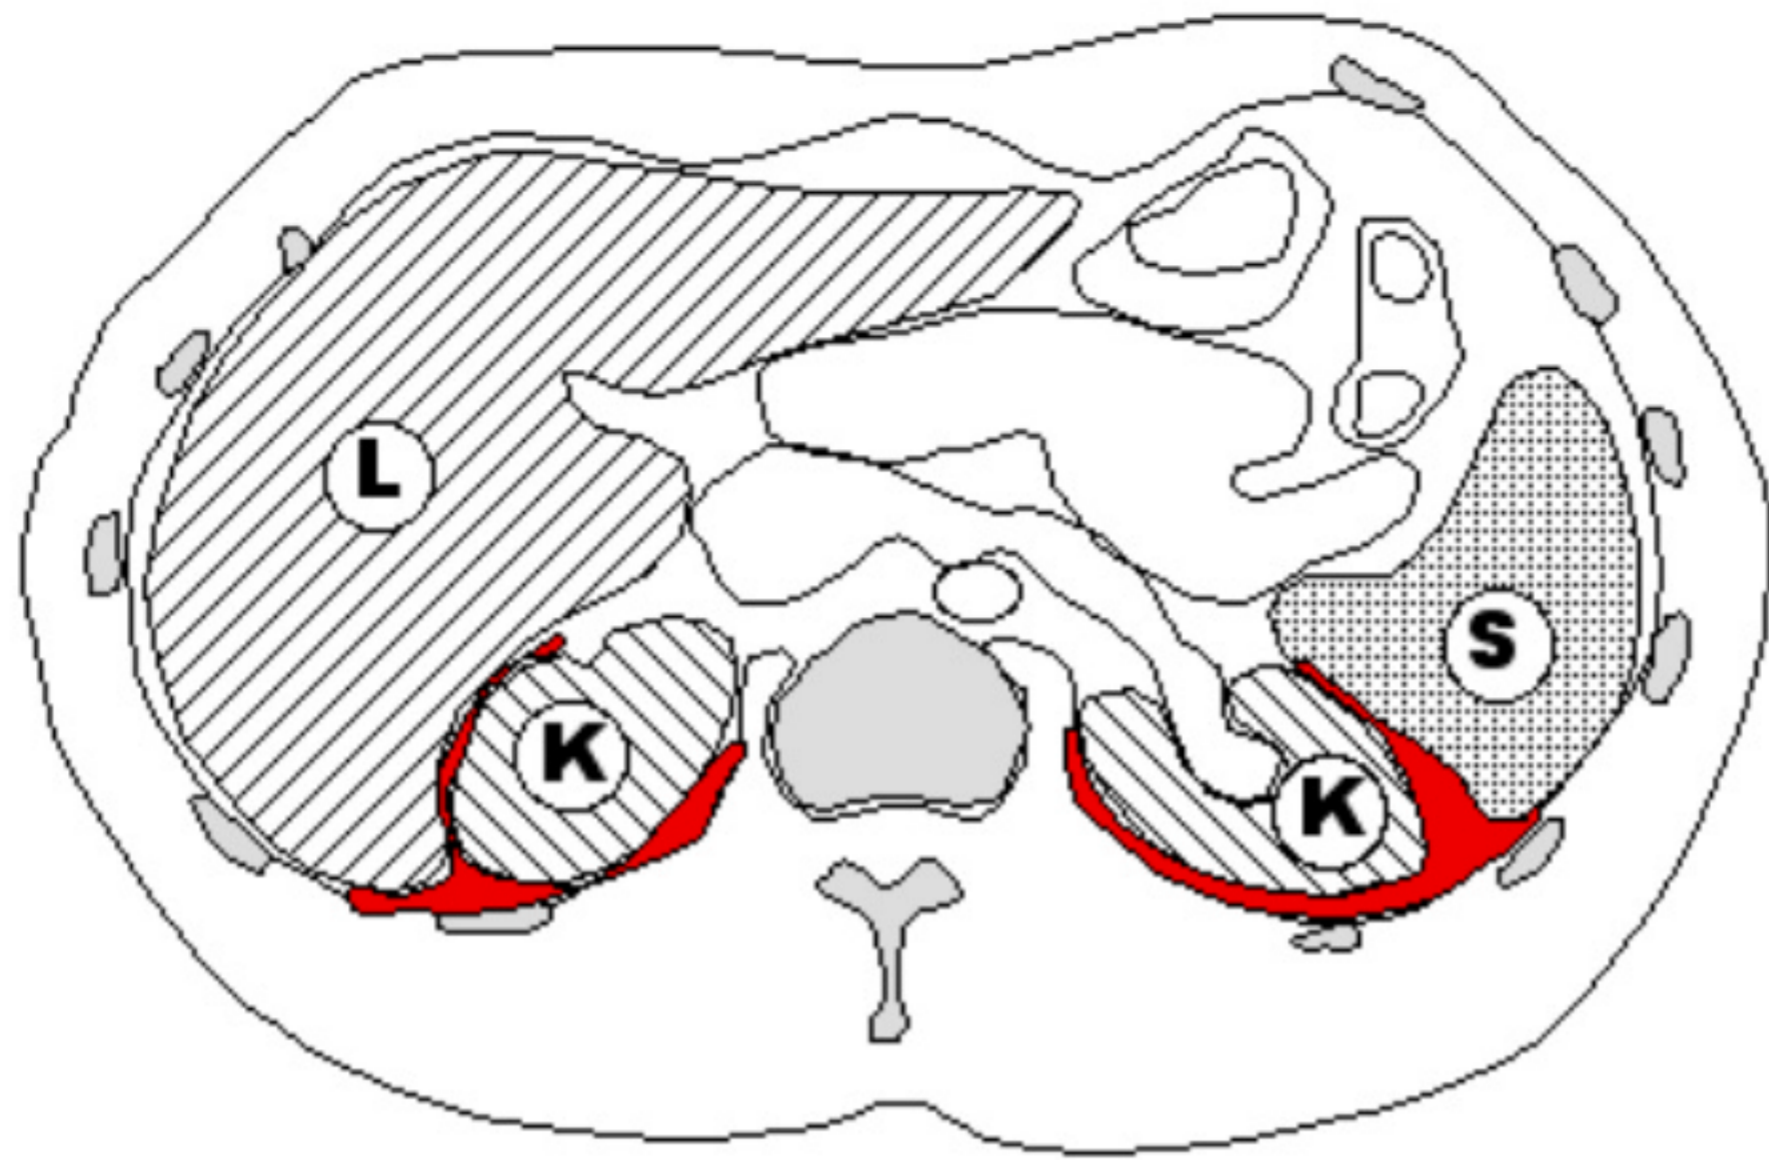

a)

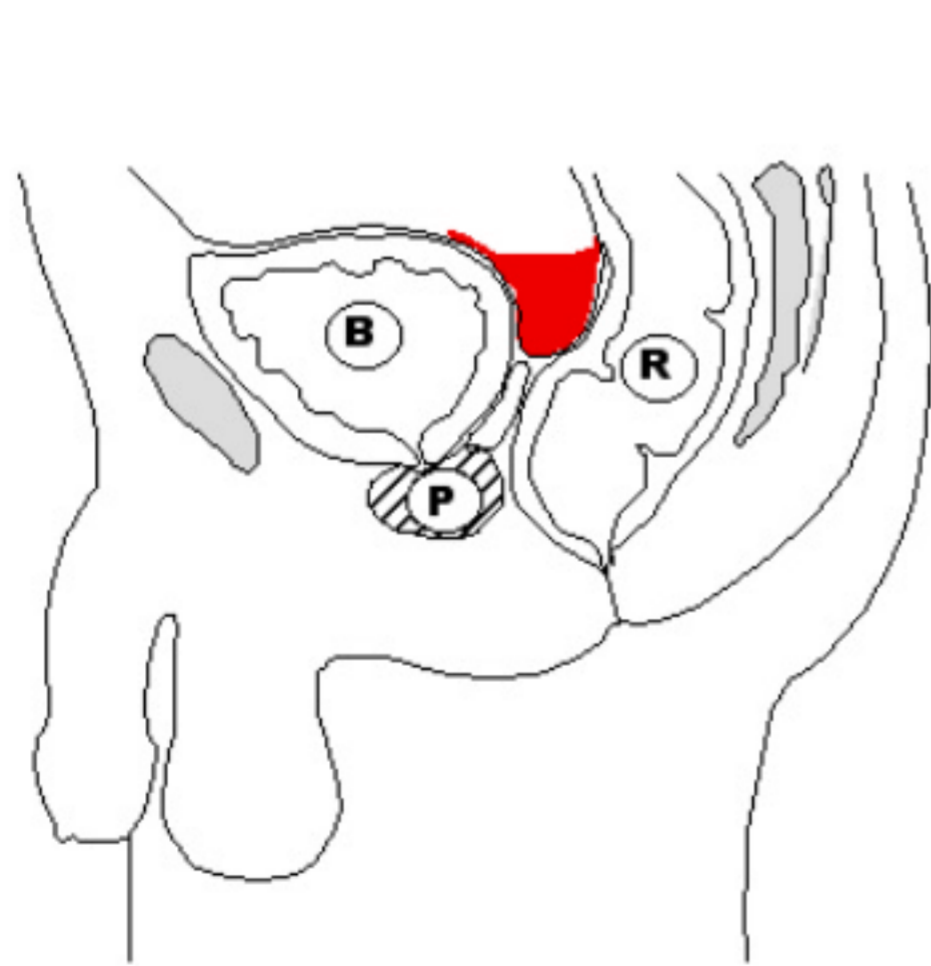

b)

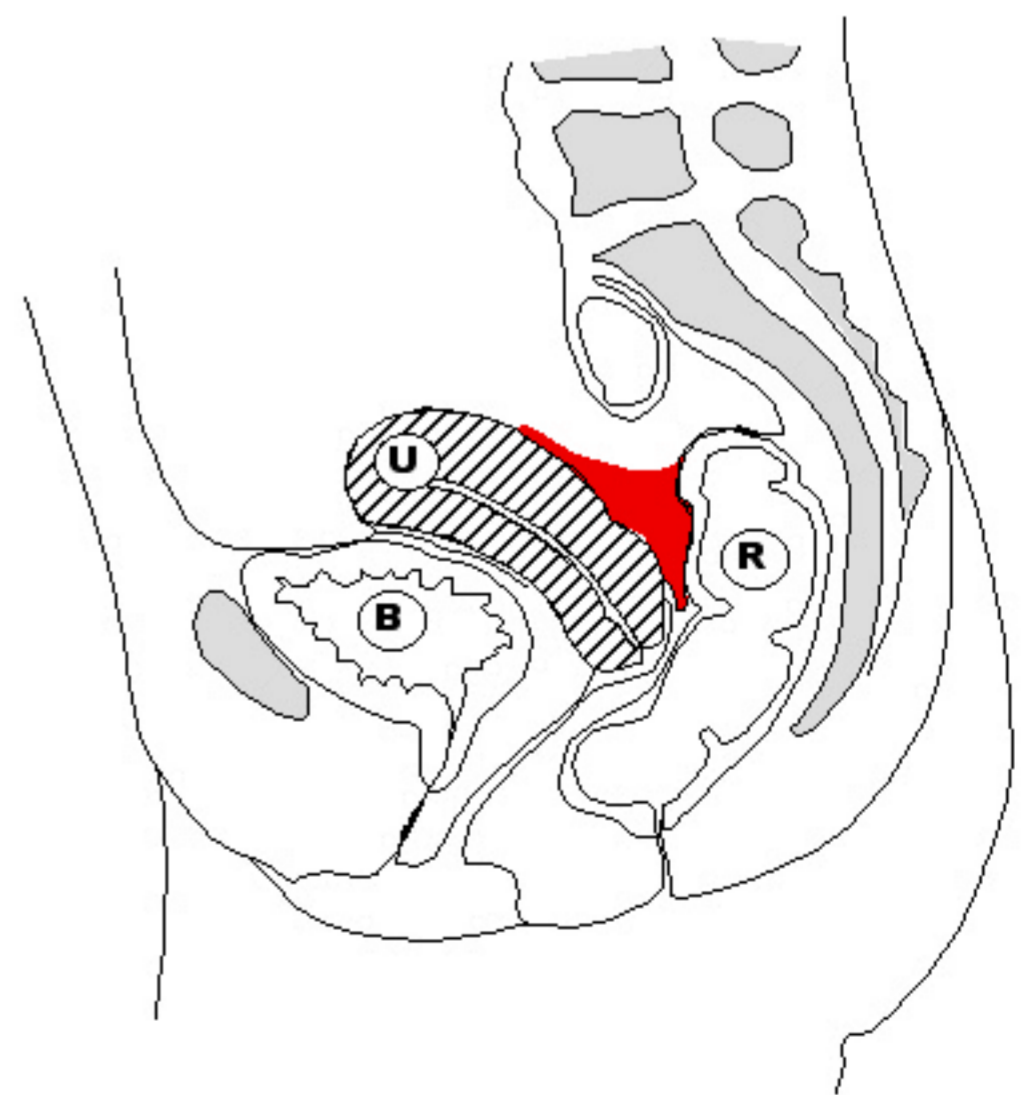

c)

Supplement: MOESM2 [file 9651450]
